# Supplementary material for: Interdependence of cellular and network properties in respiratory rhythmogenesis
Source: PubMed Central journal article supplement (PMC10634953; doi:10.1101/2023.10.30.564834), 2023-11-02
Supplement: NIHPP2023.10.30.564834v1-supplement-1.pdf [file NIHPP2023.10.30.564834v1-supplement-1.pdf]

## SUPPLEMENTARY MATERIAL

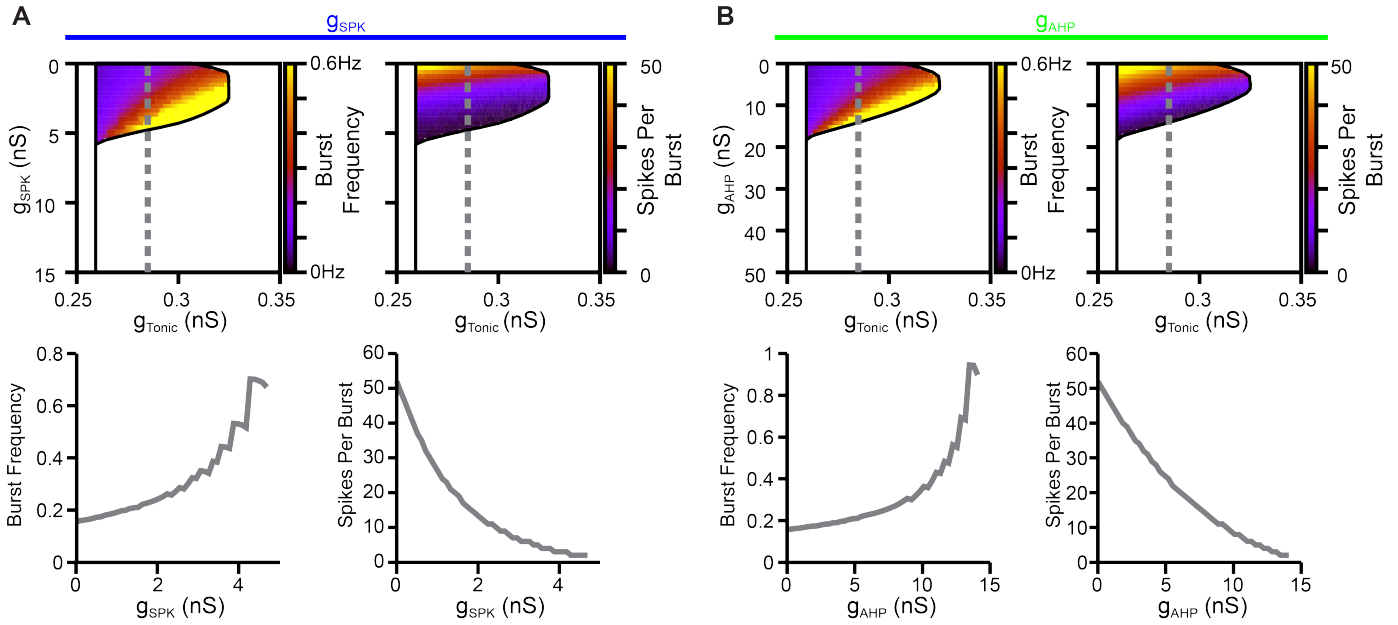

**Figure 1 Supplement 1.** Effect of changes in (A)  $g_{SPK}$  or (B)  $g_{AHP}$  on burst frequency (left) and the number of spikes per burst (right).

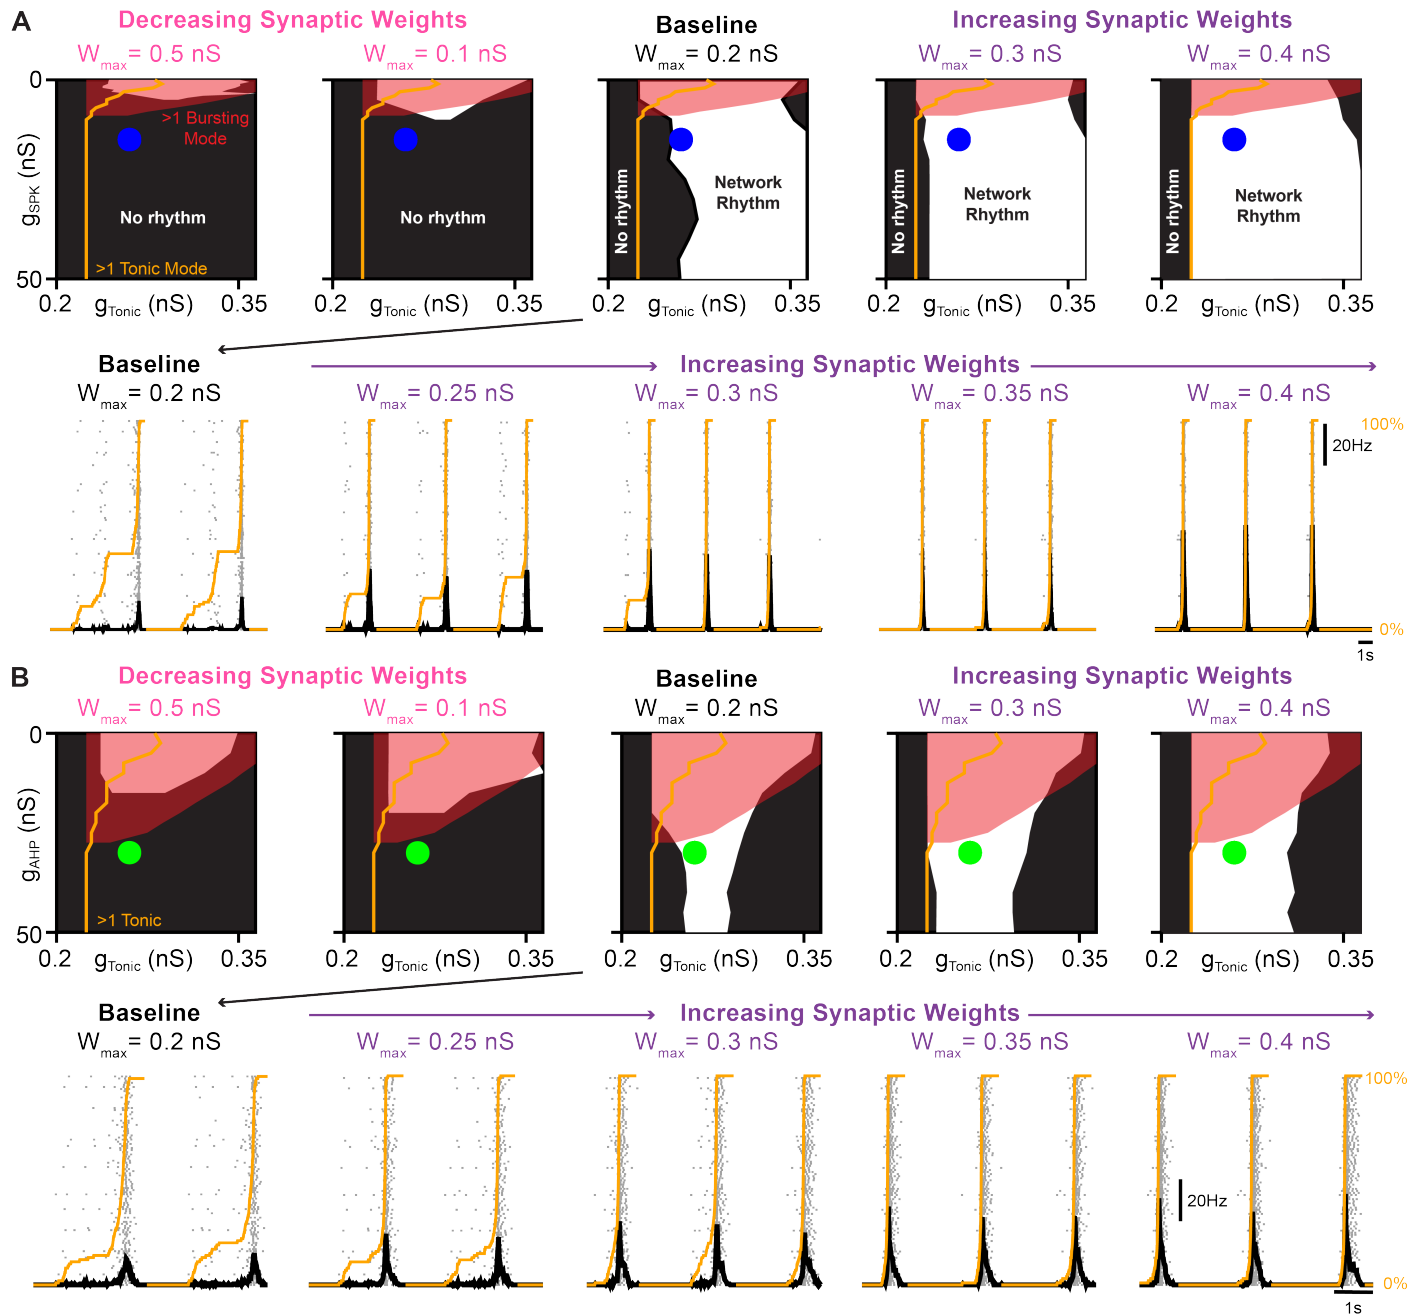

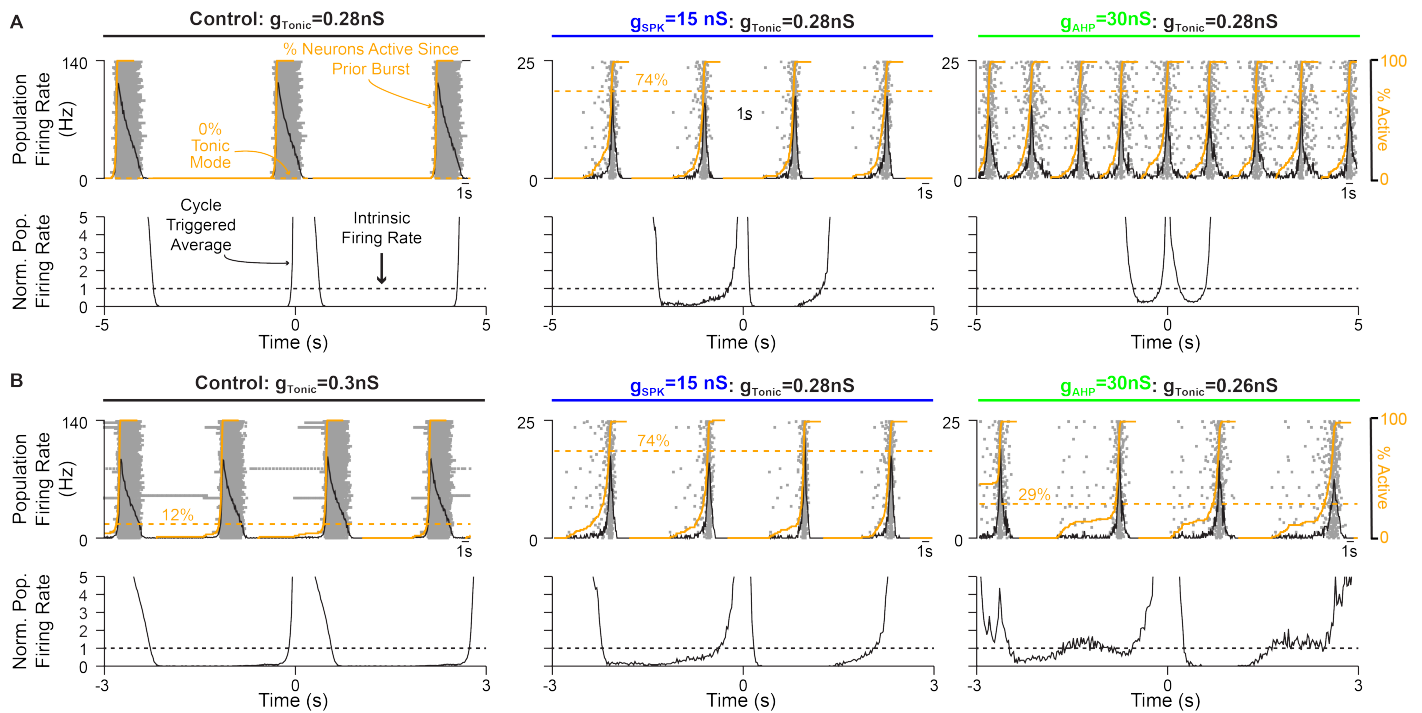

**Figure 2-Figure Supplement 2. Relationship between pre-inspiratory spiking, the percentage of neurons in tonic spiking mode and the intrinsic network firing rate.** Example traces (top) and cycle triggered averages (bottom) in networks with (A) fixed excitability ( $g_{Tonic}$ ) or (B) altered excitability such that network frequencies are roughly equal ( $\approx 3 Hz$ ). Notice the emergence of pre-inspiratory spiking coincides with the transition of neurons into tonic mode due in the control network and in networks with altered spike shapes.

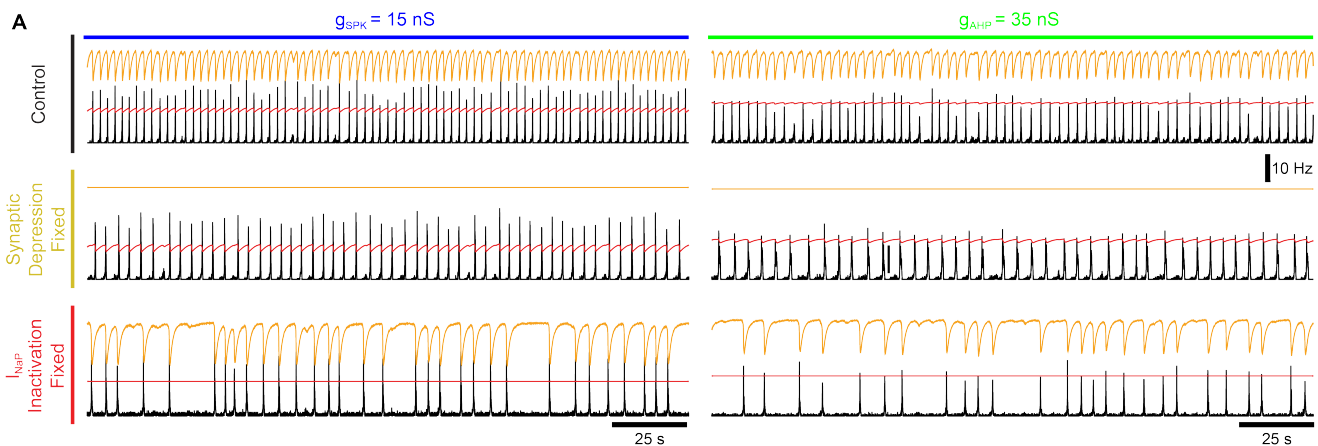

**Figure 3 Supplement 1.** Example network activity (firing rate) and corresponding synaptic depression (orange lines) and  $I_{NaP}$  inactivation (red lines) in networks with  $g_{SPK} = 15 nS$  (left) or  $g_{AHP} = 35 nS$  (right) under baseline conditions (top) or after fixing synaptic depression (middle) or  $I_{NaP}$  inactivation (bottom).

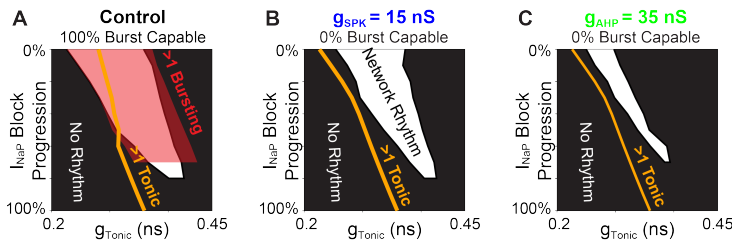

**Figure 4 Supplement 1.** Parameter space supporting intrinsic bursting (red) and network rhythmogenesis (white) as a function of excitability ( $g_{Tonic}$ ) during progressive  $I_{NaP}$  block in (A) a control network with 100% of neurons initially burst capable ( $g_{SPK} = g_{AHP} = 0$ ) and in networks with (B)  $g_{SPK} = 15nS$  or (C)  $g_{AHP} = 35nS$  to eliminate intrinsic bursting. Orange lines indicate  $g_{Tonic}$  value at which  $\geq 1$  neuron enters tonic spiking mode.

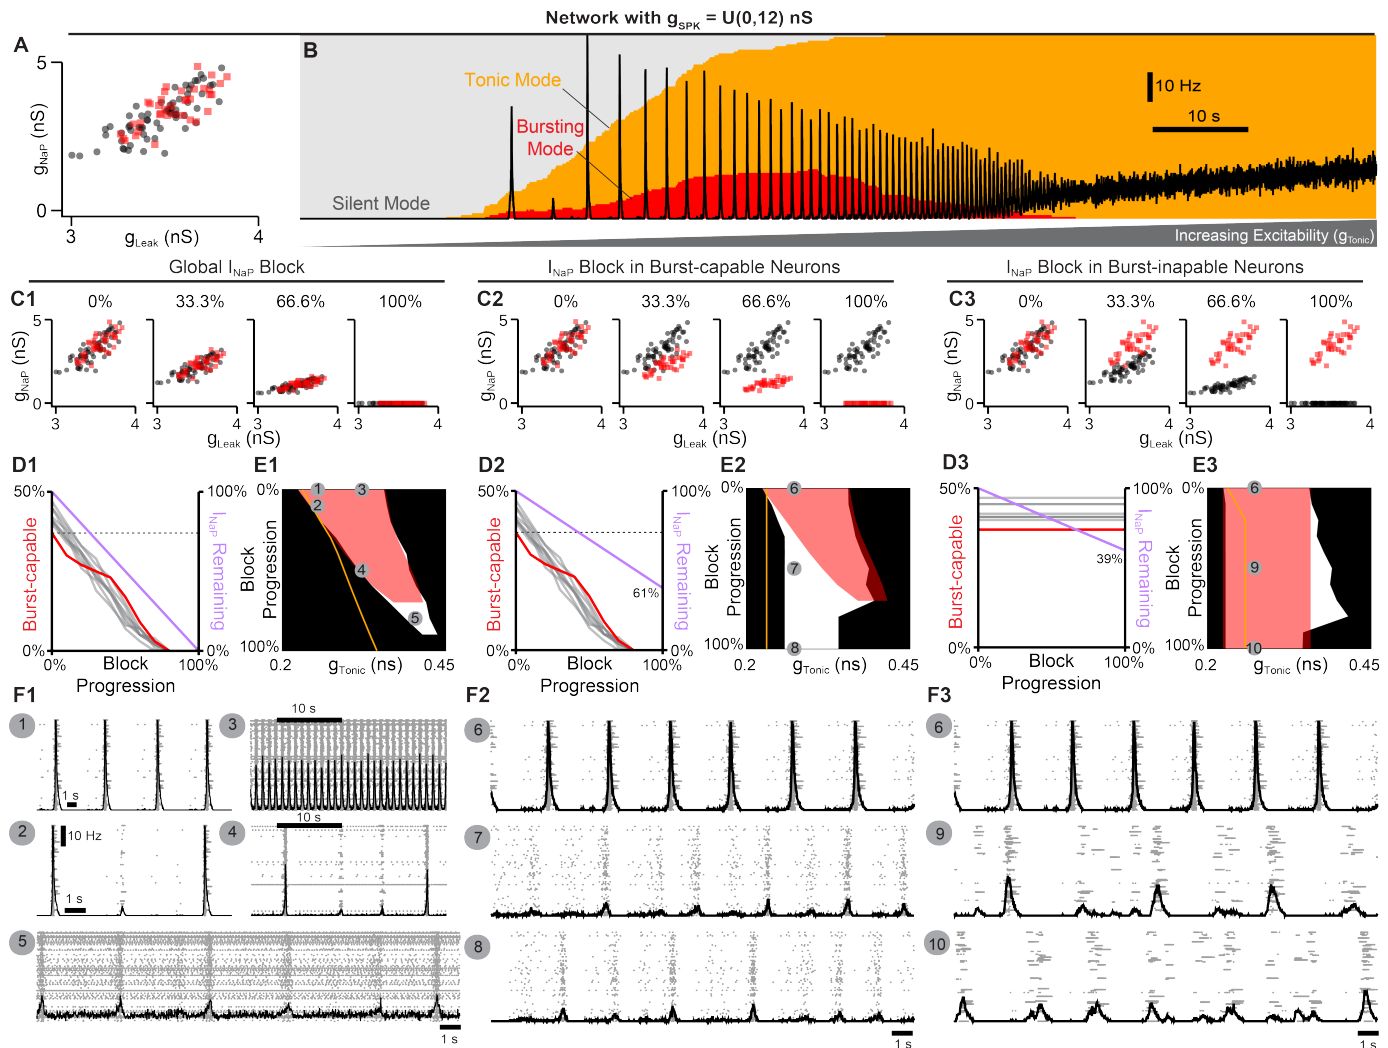

**Figure 4 Supplement 2.** Selective block of  $I_{NaP}$  in burst-capable or burst-incapable neurons has similar consequences for rhythm generation. (A) Distributions of  $g_{NaP}$  and  $g_{Leak}$  among burst-capable (red) and incapable (black) neurons in a network with  $g_{SPK} = U(0,12)nS$ . (B) Prevalence of silent, bursting, and tonic intrinsic cellular activities with overlaid network firing rate during increasing  $g_{Tonic}$  in the same network. (C1-3) Comparison of global  $I_{NaP}$  block (C1) vs. progressive  $I_{NaP}$  block specifically in neurons that are initially burst-capable (C2) or burst-incapable (C3). (D1-3) Fraction of the network that is burst-capable and amount of  $I_{NaP}$  remaining as a function of  $I_{NaP}$  block progression. (E1-3) Parameter space supporting intrinsic bursting (red) and network rhythmogenesis (white) as a function of excitability ( $g_{Tonic}$ ) during progressive  $I_{NaP}$  block. (F1-F3) Raster plots and overlaid network firing rate corresponding to points 1-10 shown in E1-3.

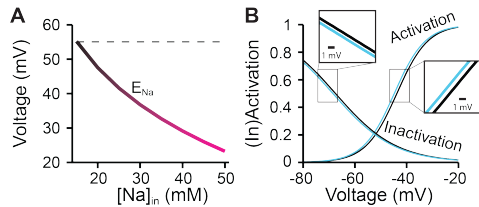

**Figure 5 Supplement 1.** Hypoxia related effects of (A) accumulating  $[Na^+]_{in}$  on sodium reversal potential and (B) a hyperpolarizing shift in the (in)activation dynamics of spike generating sodium currents.

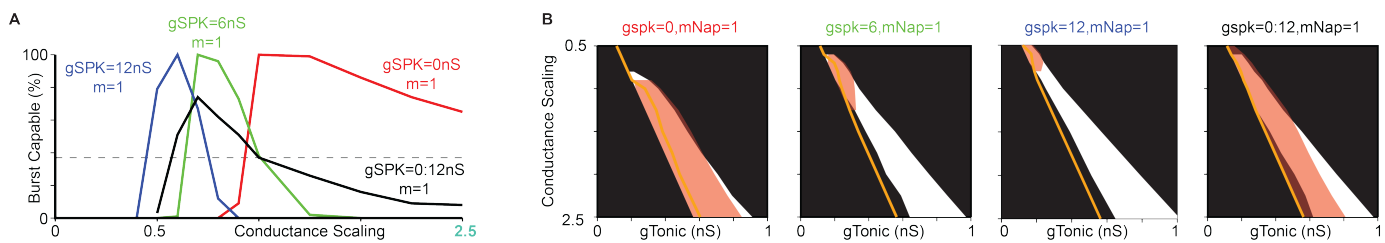

**Figure 6 Supplement 1.** Comparison of conductance scaling across networks with  $g_{SPK} = 0nS$ ,  $g_{SPK} = 6nS$ ,  $g_{SPK} = 12nS$ , or  $g_{SPK} = U(0, 12)nS$  showing (A) fraction of the network that is burst-capable, and (B) parameter spaces supporting intrinsic bursting (red) and network rhythmogenesis (white) as conductances are up- or down-scaled (Orange lines indicate  $g_{Tonic}$  where  $\geq 1$  neuron enters tonic spiking mode).

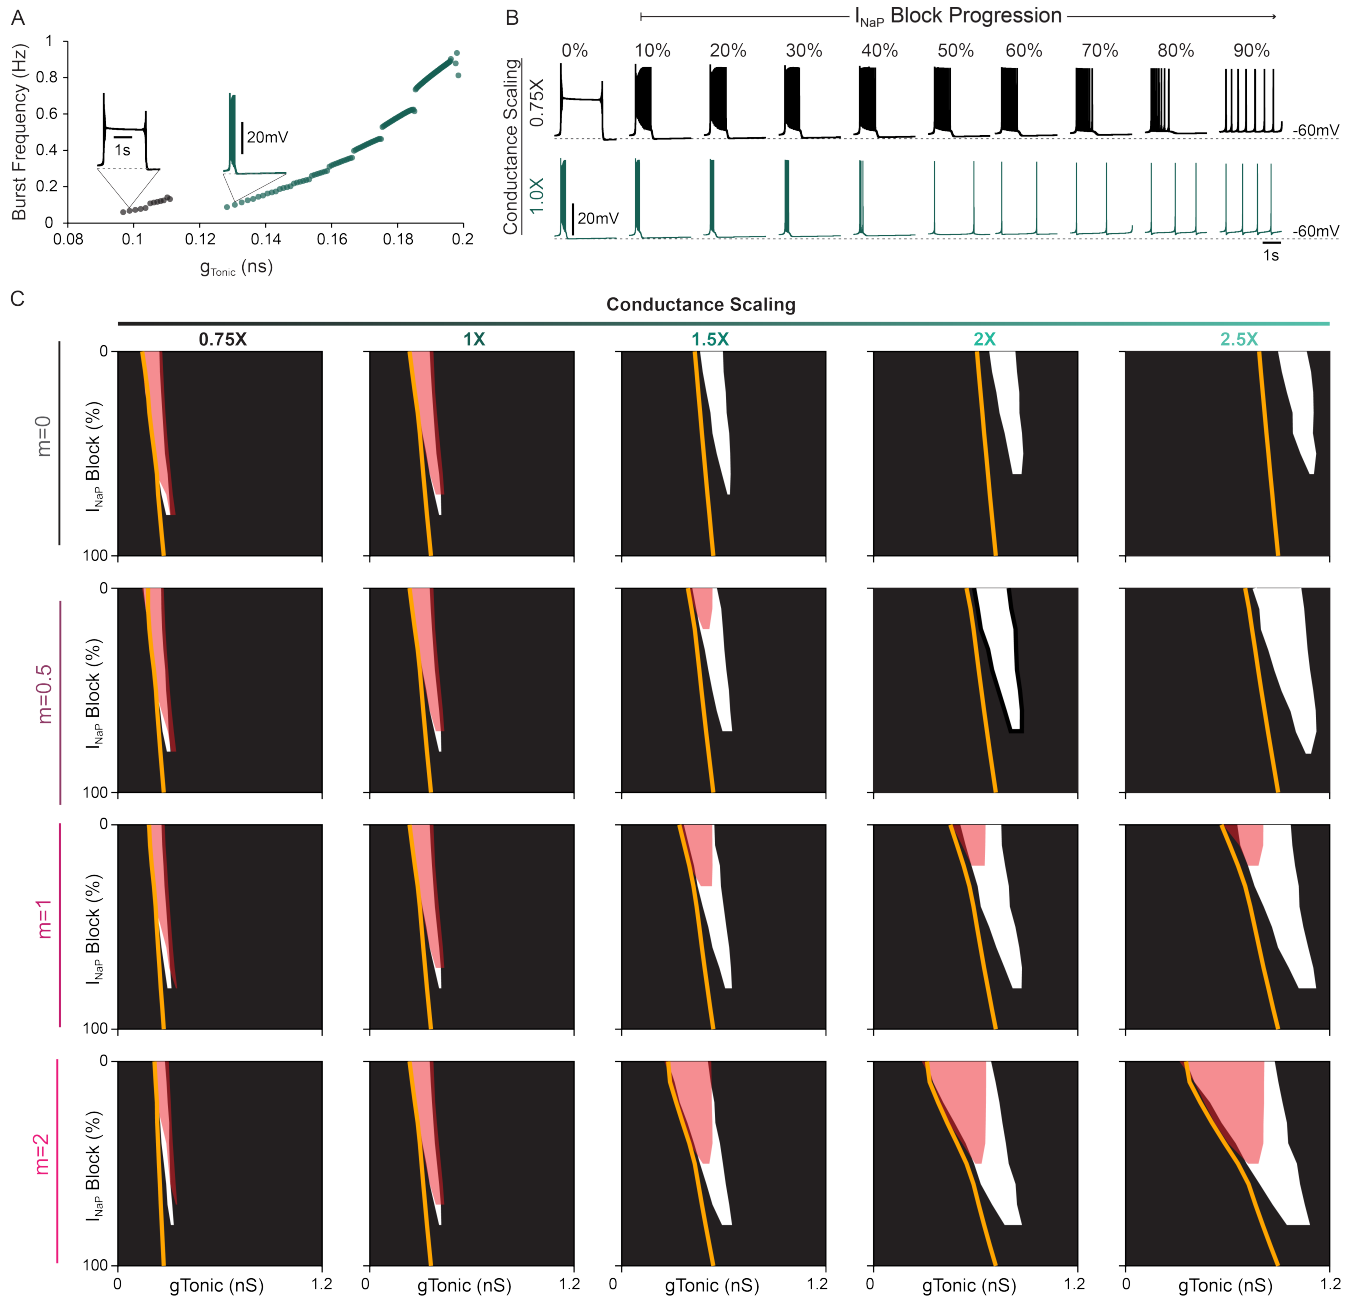

**Figure 6 Supplement 2.** (A) Relationship between excitability ( $g_{Tonic}$ ) and burst frequency and (B) effect of simulated  $I_{NaP}$  block on intrinsic bursting capabilities for a neuron in with reduced conductance scaling (0.75X,  $m=1$ ) compared to control scaling (1.0X,  $m=1$ ). (C) Parameter space supporting network rhythmogenesis during progressive  $I_{NaP}$  block with scaled conductances.

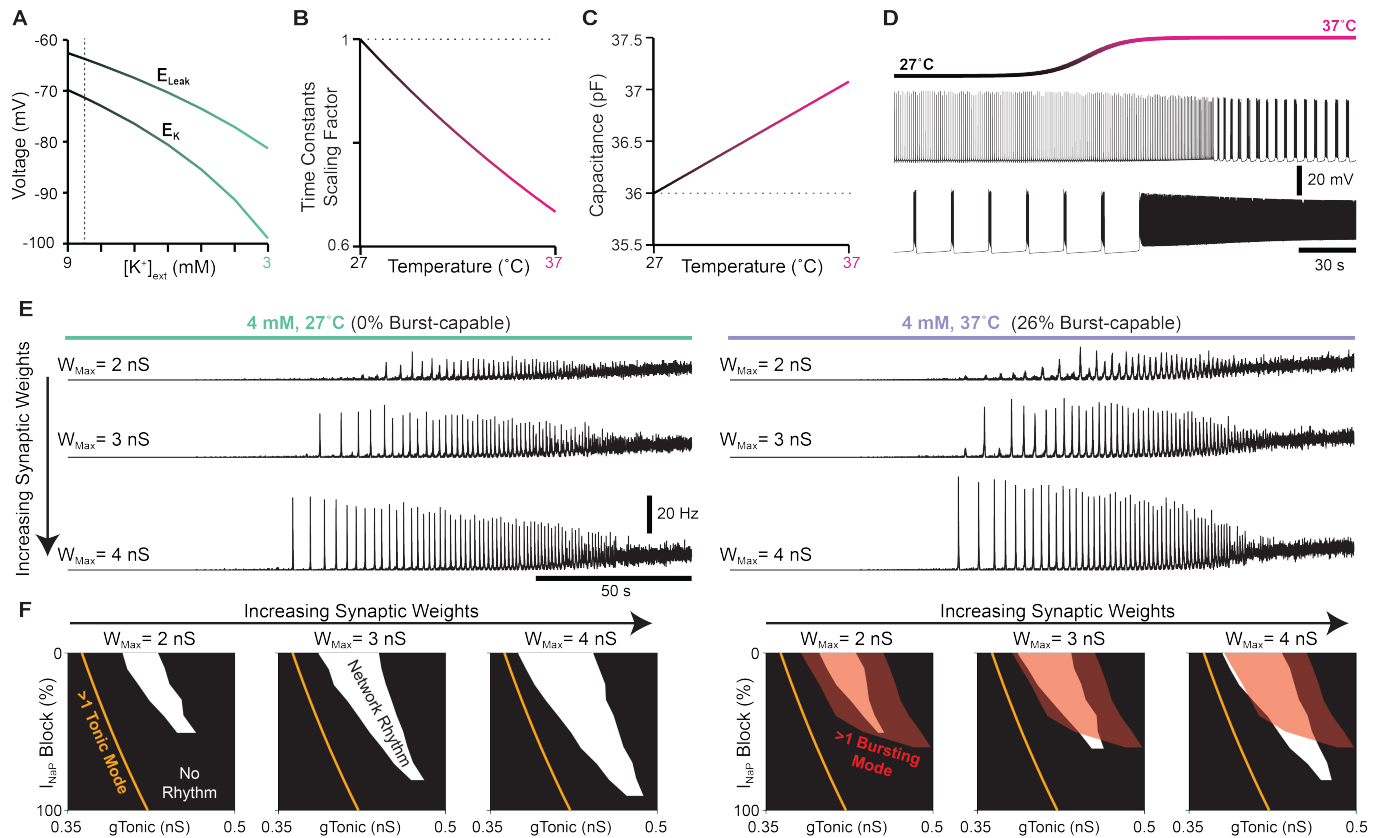

**Figure 7 Supplement 1. Impact of extracellular potassium, temperature and synaptic weights on network properties and dynamics.** (A) Relationship between the potassium ( $E_K$ ) and leak ( $E_{Leak}$ ) reversal potentials and extracellular potassium  $[K^+]_{ext}$ . Relationship between the scaling of time constants (B) and cellular capacitance (C) and the imposed temperature. (D) Example voltage traces illustrating the transition of a neuron from tonic to bursting mode and from bursting to tonic mode in response to an increase in temperature. (E) Effect of increases in synaptic weights on the network rhythm at physiological potassium and *in vitro* (left) or *in vivo* (right) temperatures. (F) Simulated  $I_{NaP}$  attenuation on network rhythms and intrinsic bursting.

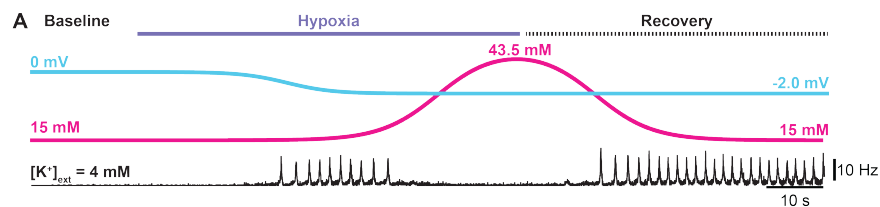

**Figure 7 Supplement 2. Simulated hypoxia at physiological  $[K^+]_{ext}$ .** (A) Network rhythm during transient hypoxia and recovery.
